# Supplementary material for: Serum MMP-9: a novel biomarker for prediction of clinical relapse in patients with quiescent Crohn’s disease, a post hoc analysis
Source: PubMed Central journal article supplement — Ther Adv Gastroenterol. 2019 Oct 9;12:1756284819881590. doi: 10.1177/1756284819881590 (PMC6785911; doi:10.1177/1756284819881590), 2019-10-09
Supplement: TAG.pdf [file TAG.pdf]

# SAGE AUTHORSHIP CHANGE REQUEST

## INSTRUCTIONS:

Please complete all sections of this form. We require that **all** authors (including current co-authors, those to be added and those to be removed) sign the relevant sections below. We require all signatures on the same copy of the form. Once complete, please email the form back to the sender.

## SECTION ONE: PAPER INFORMATION

|                                                                                                                                    |                                          |  |
|------------------------------------------------------------------------------------------------------------------------------------|------------------------------------------|--|
| JOURNAL NAME                                                                                                                       | Therapeutic Advances in Gastroenterology |  |
| PAPER TITLE                                                                                                                        | MANUSCRIPT ID NUMBER                     |  |
| SERUM MMP-9 - A NOVEL BIOMARKER FOR PREDICTION OF CLINICAL RELAPSE IN PATIENTS WITH QUIESCENT CROHN'S DISEASE, A POST HOC ANALYSIS | TAG-19-04-095.R1                         |  |

## SECTION TWO: ESSENTIAL CONDITIONS FOR CHANGE

The new author list should contain only those who can legitimately claim authorship. This is all those who:

- 1) Have made a substantial contribution to the concept or design of the article; or the acquisition, analysis, or interpretation of data for the article; AND
- 2) Drafted the article or revised it critically for important intellectual content; AND
- 3) Approved the version to be published; AND
- 4) Agreed to be accountable for all aspects of the work in ensuring that questions related to the accuracy or integrity of any part of the work are appropriately investigated and resolved.

NB: Registered authors should meet the conditions of all of the points above. All contributors who do not meet the criteria for authorship should instead be listed in an 'Acknowledgements' section.

## SECTION THREE: REASON FOR AUTHORSHIP CHANGE

Please provide a detailed explanation for the change in authors in the box below.

DR. IDO LAISH WHO HAS CONTRIBUTED TO RECRUITMENT & DATA GATHERING, AND PARTICIPATED IN DATA INTERPRETATION & CRITICAL REVISION OF THE MANUSCRIPT FOR IMPORTANT INTELLECTUAL CONTENT, WAS INADVERTENTLY OMITTED FROM THE AUTHORS LIST AND IS NOW RE-INSERTED, AS APPROPRIATE.



**SECTION FOUR: AUTHOR DECLARATIONS**

We agree to the proposed change of authorship to the above paper. NB: all authors (added and removed) must sign below.

**DECLARATION: All the below listed authors agree that they can claim authorship to the submitted paper as they meet the criteria of the points listed in SECTION TWO.**

| List of <u>existing and proposed new authors</u> to sign. Please sign, indicating your agreement to the proposed change <u>and order</u> . The individuals listed below will each be credited as authors in the published paper. (Please ask if additional rows are required.) |                                                                                      |         |
|--------------------------------------------------------------------------------------------------------------------------------------------------------------------------------------------------------------------------------------------------------------------------------|--------------------------------------------------------------------------------------|---------|
| Author name                                                                                                                                                                                                                                                                    | Author signature                                                                     | Date    |
| Doron Yablecovitch                                                                                                                                                                                                                                                             | 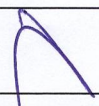   | 11/9/19 |
| Uri Kopylov                                                                                                                                                                                                                                                                    |     | 11/9/19 |
| Adi Lahat                                                                                                                                                                                                                                                                      | Adi Lahat                                                                            | 11/9/19 |
| Michal M. Amitay                                                                                                                                                                                                                                                               |     | 12/9/19 |
| Eyal Klang                                                                                                                                                                                                                                                                     | Eyal K.                                                                              | 12/9/19 |
| Dana Ben-Ami Shur                                                                                                                                                                                                                                                              | Dana Ben Ami                                                                         | 11/9/19 |
| Sandra Neuman                                                                                                                                                                                                                                                                  | Sandra                                                                               | 11.9.19 |
| Nina Levhar                                                                                                                                                                                                                                                                    |  | 11/9/19 |
| Ella Fudim                                                                                                                                                                                                                                                                     |  | 11/9/19 |
| Benjamin Avidan                                                                                                                                                                                                                                                                |  | 11.9.19 |
| Ido Laish                                                                                                                                                                                                                                                                      |  | 11/9/19 |
| Limor Sekinger                                                                                                                                                                                                                                                                 |   | 11/9/19 |
| Noam Zingboim-Orbach                                                                                                                                                                                                                                                           | Noam                                                                                 | 11/9/19 |
| Orit Picard                                                                                                                                                                                                                                                                    |   | 11/9/19 |
| Miri Yavzori                                                                                                                                                                                                                                                                   | Miri Yavzori                                                                         | 11/9/19 |
| Rami Eljakim                                                                                                                                                                                                                                                                   |  | 11/9/19 |
| Shimon Ben-Horin                                                                                                                                                                                                                                                               |  | 12/9/19 |
